# Supplementary material for: Rolling circle amplification (RCA) -based biosensor system for the fluorescent detection of miR-129-2-3p miRNA
Source: PeerJ. 2022 Oct 24;10:e14257. doi: 10.7717/peerj.14257 (PMC9610657; doi:10.7717/peerj.14257)
Supplement: Supplemental Information 1 [file peerj-10-14257-s001.xlsx]

## Sheet: SampleInfo_contrib1-GPL18941
Accession	1:DIAGNOSIS	1:TISSUE	hsa-miR-129-2-3p
GSM1876422	breast cancer	serum	3.58242
GSM1876423	breast cancer	serum	3.53444
GSM1876424	breast cancer	serum	3.84499
GSM1876425	breast cancer	serum	4.62513
GSM1876426	breast cancer	serum	5.17602
GSM1876427	breast cancer	serum	4.35943
GSM1876428	breast cancer	serum	5.24907
GSM1876429	breast cancer	serum	4.9002
GSM1876430	breast cancer	serum	4.88574
GSM1876431	breast cancer	serum	5.3357
GSM1876432	breast cancer	serum	3.96999
GSM1876433	breast cancer	serum	3.70975
GSM1876434	breast cancer	serum	5.04441
GSM1876435	breast cancer	serum	2.80396
GSM1876436	breast cancer	serum	3.47779
GSM1876437	breast cancer	serum	6.30923
GSM1876438	breast cancer	serum	5.36808
GSM1876439	breast cancer	serum	6.44868
GSM1876440	breast cancer	serum	3.97782
GSM1876441	breast cancer	serum	4.67632
GSM1876442	breast cancer	serum	3.46167
GSM1876443	breast cancer	serum	5.38338
GSM1876444	breast cancer	serum	4.60101
GSM1876445	breast cancer	serum	2.64397
GSM1876446	breast cancer	serum	4.29292
GSM1876447	breast cancer	serum	3.17197
GSM1876448	breast cancer	serum	5.37574
GSM1876449	breast cancer	serum	4.84986
GSM1876450	breast cancer	serum	5.23094
GSM1876451	breast cancer	serum	3.73047
GSM1876452	breast cancer	serum	4.84344
GSM1876453	breast cancer	serum	4.48404
GSM1876454	breast cancer	serum	4.23953
GSM1876455	breast cancer	serum	5.31522
GSM1876456	breast cancer	serum	3.8063
GSM1876457	breast cancer	serum	4.88095
GSM1876458	breast cancer	serum	4.63338
GSM1876459	breast cancer	serum	4.71529
GSM1876460	breast cancer	serum	4.05131
GSM1876461	breast cancer	serum	4.87544
GSM1876462	breast cancer	serum	4.06662
GSM1876463	breast cancer	serum	5.69588
GSM1876464	breast cancer	serum	6.06049
GSM1876465	breast cancer	serum	4.29439
GSM1876466	breast cancer	serum	3.78882
GSM1876467	breast cancer	serum	5.51233
GSM1876468	breast cancer	serum	5.17862
GSM1876469	breast cancer	serum	4.32823
GSM1876470	breast cancer	serum	3.8432
GSM1876471	breast cancer	serum	5.98769
GSM1876472	breast cancer	serum	4.655
GSM1876473	breast cancer	serum	3.56107
GSM1876474	breast cancer	serum	3.77681
GSM1876475	breast cancer	serum	3.37791
GSM1876476	breast cancer	serum	6.41215
GSM1876477	breast cancer	serum	5.25625
GSM1876478	breast cancer	serum	3.93388
GSM1876479	breast cancer	serum	5.2913
GSM1876480	breast cancer	serum	4.45328
GSM1876481	breast cancer	serum	4.99543
GSM1876482	breast cancer	serum	5.04576
GSM1876483	breast cancer	serum	4.40694
GSM1876484	breast cancer	serum	3.31605
GSM1876485	breast cancer	serum	3.59948
GSM1876486	breast cancer	serum	5.03003
GSM1876487	breast cancer	serum	5.74747
GSM1876488	breast cancer	serum	4.3867
GSM1876489	breast cancer	serum	2.97147
GSM1876490	breast cancer	serum	4.32628
GSM1876491	breast cancer	serum	4.13273
GSM1876492	breast cancer	serum	4.20775
GSM1876493	breast cancer	serum	3.11857
GSM1876494	breast cancer	serum	4.97834
GSM1876495	breast cancer	serum	4.68776
GSM1876496	breast cancer	serum	4.57962
GSM1876497	breast cancer	serum	4.79921
GSM1876498	breast cancer	serum	4.4948
GSM1876499	breast cancer	serum	3.50618
GSM1876500	breast cancer	serum	3.40714
GSM1876501	breast cancer	serum	7.20094
GSM1876502	breast cancer	serum	5.10169
GSM1876503	breast cancer	serum	4.55441
GSM1876504	breast cancer	serum	3.81573
GSM1876505	breast cancer	serum	4.29997
GSM1876506	breast cancer	serum	2.41476
GSM1876507	breast cancer	serum	4.17966
GSM1876508	breast cancer	serum	4.63346
GSM1876509	breast cancer	serum	4.62322
GSM1876510	breast cancer	serum	5.12069
GSM1876511	breast cancer	serum	2.70402
GSM1876512	breast cancer	serum	5.28699
GSM1876513	breast cancer	serum	5.52585
GSM1876514	breast cancer	serum	3.46944
GSM1876515	breast cancer	serum	4.17587
GSM1876516	breast cancer	serum	4.11562
GSM1876517	breast cancer	serum	3.98006
GSM1876518	breast cancer	serum	2.56541
GSM1876519	breast cancer	serum	5.30412
GSM1876520	breast cancer	serum	4.89919
GSM1876521	breast cancer	serum	4.61476
GSM1876522	breast cancer	serum	3.3695
GSM1876523	breast cancer	serum	5.46719
GSM1876524	breast cancer	serum	5.01126
GSM1876525	breast cancer	serum	5.41957
GSM1876526	breast cancer	serum	7.22249
GSM1876527	breast cancer	serum	3.75769
GSM1876528	breast cancer	serum	2.24265
GSM1876529	breast cancer	serum	4.02183
GSM1876530	breast cancer	serum	3.76911
GSM1876531	breast cancer	serum	3.11964
GSM1876532	breast cancer	serum	3.31062
GSM1876533	breast cancer	serum	4.92664
GSM1876534	breast cancer	serum	3.45654
GSM1876535	breast cancer	serum	3.82593
GSM1876536	breast cancer	serum	4.67862
GSM1876537	breast cancer	serum	3.27514
GSM1876538	breast cancer	serum	4.1291
GSM1876539	breast cancer	serum	4.63853
GSM1876540	breast cancer	serum	3.52434
GSM1876541	breast cancer	serum	3.94819
GSM1876542	breast cancer	serum	3.37787
GSM1876543	breast cancer	serum	3.03346
GSM1876544	breast cancer	serum	3.06541
GSM1876545	breast cancer	serum	2.05112
GSM1876546	breast cancer	serum	2.73503
GSM1876547	breast cancer	serum	2.6627
GSM1876548	breast cancer	serum	3.29406
GSM1876549	breast cancer	serum	1.72492
GSM1876550	breast cancer	serum	3.63978
GSM1876551	breast cancer	serum	3.71432
GSM1876552	breast cancer	serum	2.13903
GSM1876553	breast cancer	serum	1.91084
GSM1876554	breast cancer	serum	5.07991
GSM1876555	breast cancer	serum	5.98212
GSM1876556	breast cancer	serum	4.78369
GSM1876557	breast cancer	serum	5.1042
GSM1876558	breast cancer	serum	5.39497
GSM1876559	breast cancer	serum	4.71764
GSM1876560	breast cancer	serum	4.00586
GSM1876561	breast cancer	serum	5.16292
GSM1876562	breast cancer	serum	5.15097
GSM1876563	breast cancer	serum	5.68366
GSM1876564	breast cancer	serum	5.75168
GSM1876565	breast cancer	serum	5.29759
GSM1876566	breast cancer	serum	5.05118
GSM1876567	breast cancer	serum	5.45964
GSM1876568	breast cancer	serum	4.35143
GSM1876569	breast cancer	serum	4.15738
GSM1876570	breast cancer	serum	3.00354
GSM1876571	breast cancer	serum	5.8548
GSM1876572	breast cancer	serum	3.85963
GSM1876573	breast cancer	serum	4.43431
GSM1876574	breast cancer	serum	2.51882
GSM1876575	breast cancer	serum	4.05513
GSM1876576	breast cancer	serum	3.9592
GSM1876577	breast cancer	serum	5.56257
GSM1876578	breast cancer	serum	4.39075
GSM1876579	breast cancer	serum	4.09087
GSM1876580	breast cancer	serum	4.32638
GSM1876581	breast cancer	serum	5.68121
GSM1876582	breast cancer	serum	3.508
GSM1876583	breast cancer	serum	3.78882
GSM1876584	breast cancer	serum	4.299
GSM1876585	breast cancer	serum	4.45979
GSM1876586	breast cancer	serum	5.06385
GSM1876587	breast cancer	serum	3.97546
GSM1876588	breast cancer	serum	4.0317
GSM1876589	breast cancer	serum	4.0964
GSM1876590	breast cancer	serum	4.67368
GSM1876591	breast cancer	serum	3.4727
GSM1876592	breast cancer	serum	4.70977
GSM1876593	breast cancer	serum	5.53867
GSM1876594	breast cancer	serum	2.73864
GSM1876595	breast cancer	serum	5.12645
GSM1876596	breast cancer	serum	2.88647
GSM1876597	breast cancer	serum	3.54383
GSM1876598	breast cancer	serum	5.6769
GSM1876599	breast cancer	serum	4.53594
GSM1876600	breast cancer	serum	4.88123
GSM1876601	breast cancer	serum	5.22386
GSM1876602	breast cancer	serum	4.5531
GSM1876603	breast cancer	serum	4.66178
GSM1876604	breast cancer	serum	4.45046
GSM1876605	breast cancer	serum	3.48636
GSM1876606	breast cancer	serum	5.03997
GSM1876607	breast cancer	serum	5.81275
GSM1876608	breast cancer	serum	5.12402
GSM1876609	breast cancer	serum	4.46874
GSM1876610	breast cancer	serum	4.10658
GSM1876611	breast cancer	serum	4.65616
GSM1876612	breast cancer	serum	4.86349
GSM1876613	breast cancer	serum	4.92224
GSM1876614	breast cancer	serum	4.19054
GSM1876615	breast cancer	serum	3.10169
GSM1876616	breast cancer	serum	4.3947
GSM1876617	breast cancer	serum	4.87914
GSM1876618	breast cancer	serum	5.01963
GSM1876619	breast cancer	serum	3.81884
GSM1876620	breast cancer	serum	5.15856
GSM1876621	breast cancer	serum	3.65317
GSM1876622	breast cancer	serum	4.13884
GSM1876623	breast cancer	serum	2.39412
GSM1876624	breast cancer	serum	4.21622
GSM1876625	breast cancer	serum	3.66476
GSM1876626	breast cancer	serum	5.71915
GSM1876627	breast cancer	serum	3.56684
GSM1876628	breast cancer	serum	4.49864
GSM1876629	breast cancer	serum	4.87278
GSM1876630	breast cancer	serum	4.18205
GSM1876631	breast cancer	serum	5.12813
GSM1876632	breast cancer	serum	5.03686
GSM1876633	breast cancer	serum	5.0608
GSM1876634	breast cancer	serum	4.26095
GSM1876635	breast cancer	serum	5.36368
GSM1876636	breast cancer	serum	6.62197
GSM1876637	breast cancer	serum	7.19104
GSM1876638	breast cancer	serum	6.48101
GSM1876639	breast cancer	serum	4.61944
GSM1876640	breast cancer	serum	5.59875
GSM1876641	breast cancer	serum	4.64517
GSM1876642	breast cancer	serum	5.17674
GSM1876643	breast cancer	serum	4.25348
GSM1876644	breast cancer	serum	5.34229
GSM1876645	breast cancer	serum	6.22472
GSM1876646	breast cancer	serum	5.63932
GSM1876647	breast cancer	serum	7.39304
GSM1876648	breast cancer	serum	5.56194
GSM1876649	breast cancer	serum	5.50899
GSM1876650	breast cancer	serum	4.39453
GSM1876651	breast cancer	serum	5.7944
GSM1876652	breast cancer	serum	4.89866
GSM1876653	breast cancer	serum	5.50843
GSM1876654	breast cancer	serum	5.35895
GSM1876655	breast cancer	serum	4.8914
GSM1876656	breast cancer	serum	6.18423
GSM1876657	breast cancer	serum	3.63976
GSM1876658	breast cancer	serum	3.10346
GSM1876659	breast cancer	serum	5.61263
GSM1876660	breast cancer	serum	4.61629
GSM1876661	breast cancer	serum	3.67677
GSM1876662	breast cancer	serum	4.49785
GSM1876663	breast cancer	serum	5.1922
GSM1876664	breast cancer	serum	4.82324
GSM1876665	breast cancer	serum	6.3498
GSM1876666	breast cancer	serum	4.71107
GSM1876667	breast cancer	serum	4.63907
GSM1876668	breast cancer	serum	4.67345
GSM1876669	breast cancer	serum	5.39732
GSM1876670	breast cancer	serum	4.07079
GSM1876671	breast cancer	serum	4.21303
GSM1876672	breast cancer	serum	4.21147
GSM1876673	breast cancer	serum	4.24311
GSM1876674	breast cancer	serum	4.82371
GSM1876675	breast cancer	serum	5.41827
GSM1876676	breast cancer	serum	5.41549
GSM1876677	breast cancer	serum	3.28715
GSM1876678	breast cancer	serum	5.01319
GSM1876679	breast cancer	serum	5.7199
GSM1876680	breast cancer	serum	4.70972
GSM1876681	breast cancer	serum	5.09227
GSM1876682	breast cancer	serum	5.30425
GSM1876683	breast cancer	serum	4.50158
GSM1876684	breast cancer	serum	2.82319
GSM1876685	breast cancer	serum	5.20465
GSM1876686	breast cancer	serum	3.81525
GSM1876687	breast cancer	serum	4.57453
GSM1876688	breast cancer	serum	3.38901
GSM1876689	breast cancer	serum	5.96972
GSM1876690	breast cancer	serum	3.91188
GSM1876691	breast cancer	serum	4.43072
GSM1876692	breast cancer	serum	4.20239
GSM1876693	breast cancer	serum	4.97517
GSM1876694	breast cancer	serum	5.54099
GSM1876695	breast cancer	serum	2.90396
GSM1876696	breast cancer	serum	4.48077
GSM1876697	breast cancer	serum	4.86109
GSM1876698	breast cancer	serum	5.18511
GSM1876699	breast cancer	serum	4.69331
GSM1876700	breast cancer	serum	4.9491
GSM1876701	breast cancer	serum	4.13712
GSM1876702	breast cancer	serum	4.40772
GSM1876703	breast cancer	serum	3.73653
GSM1876704	breast cancer	serum	3.03749
GSM1876705	breast cancer	serum	5.0279
GSM1876706	breast cancer	serum	4.4229
GSM1876707	breast cancer	serum	4.59809
GSM1876708	breast cancer	serum	4.7584
GSM1876709	breast cancer	serum	4.77224
GSM1876710	breast cancer	serum	4.42416
GSM1876711	breast cancer	serum	5.15655
GSM1876712	breast cancer	serum	4.31123
GSM1876713	breast cancer	serum	5.04935
GSM1876714	breast cancer	serum	3.88479
GSM1876715	breast cancer	serum	4.77457
GSM1876716	breast cancer	serum	4.281
GSM1876717	breast cancer	serum	3.72501
GSM1876718	breast cancer	serum	5.29558
GSM1876719	breast cancer	serum	4.98325
GSM1876720	breast cancer	serum	4.40367
GSM1876721	breast cancer	serum	3.81708
GSM1876722	breast cancer	serum	3.52401
GSM1876723	breast cancer	serum	3.90115
GSM1876724	breast cancer	serum	2.98808
GSM1876725	breast cancer	serum	3.86565
GSM1876726	breast cancer	serum	5.14443
GSM1876727	breast cancer	serum	5.96884
GSM1876728	breast cancer	serum	4.83421
GSM1876729	breast cancer	serum	7.19633
GSM1876730	breast cancer	serum	4.82645
GSM1876731	breast cancer	serum	5.29549
GSM1876732	breast cancer	serum	3.37222
GSM1876733	breast cancer	serum	4.664
GSM1876734	breast cancer	serum	3.13885
GSM1876735	breast cancer	serum	4.72247
GSM1876736	breast cancer	serum	4.45777
GSM1876737	breast cancer	serum	4.42473
GSM1876738	breast cancer	serum	4.3388
GSM1876739	breast cancer	serum	4.52744
GSM1876740	breast cancer	serum	3.31909
GSM1876741	breast cancer	serum	3.52695
GSM1876742	breast cancer	serum	3.35827
GSM1876743	breast cancer	serum	4.35853
GSM1876744	breast cancer	serum	3.37233
GSM1876745	breast cancer	serum	3.4159
GSM1876746	breast cancer	serum	3.36484
GSM1876747	breast cancer	serum	5.79356
GSM1876748	breast cancer	serum	4.04846
GSM1876749	breast cancer	serum	3.66107
GSM1876750	breast cancer	serum	3.88452
GSM1876751	breast cancer	serum	3.48217
GSM1876752	breast cancer	serum	4.48031
GSM1876753	breast cancer	serum	3.44662
GSM1876754	breast cancer	serum	4.66842
GSM1876755	breast cancer	serum	4.28744
GSM1876756	breast cancer	serum	4.69501
GSM1876757	breast cancer	serum	4.50408
GSM1876758	breast cancer	serum	4.80908
GSM1876759	breast cancer	serum	5.39733
GSM1876760	breast cancer	serum	4.36516
GSM1876761	breast cancer	serum	4.13507
GSM1876762	breast cancer	serum	5.29897
GSM1876763	breast cancer	serum	4.81838
GSM1876764	breast cancer	serum	4.60287
GSM1876765	breast cancer	serum	4.44424
GSM1876766	breast cancer	serum	4.89807
GSM1876767	breast cancer	serum	5.96354
GSM1876768	breast cancer	serum	4.66752
GSM1876769	breast cancer	serum	4.74619
GSM1876770	breast cancer	serum	5.78663
GSM1876771	breast cancer	serum	5.12615
GSM1876772	breast cancer	serum	5.06917
GSM1876773	breast cancer	serum	5.00544
GSM1876774	breast cancer	serum	5.68798
GSM1876775	breast cancer	serum	5.08175
GSM1876776	breast cancer	serum	5.84551
GSM1876777	breast cancer	serum	5.68308
GSM1876778	breast cancer	serum	5.72315
GSM1876779	breast cancer	serum	4.86723
GSM1876780	breast cancer	serum	3.38906
GSM1876781	breast cancer	serum	4.04442
GSM1876782	breast cancer	serum	4.99401
GSM1876783	breast cancer	serum	4.4459
GSM1876784	breast cancer	serum	4.96913
GSM1876785	breast cancer	serum	4.97041
GSM1876786	breast cancer	serum	5.27099
GSM1876787	breast cancer	serum	6.7533
GSM1876788	breast cancer	serum	5.62515
GSM1876789	breast cancer	serum	5.65393
GSM1876790	breast cancer	serum	6.13184
GSM1876791	breast cancer	serum	5.95774
GSM1876792	breast cancer	serum	3.81133
GSM1876793	breast cancer	serum	5.06734
GSM1876794	breast cancer	serum	2.97779
GSM1876795	breast cancer	serum	5.34184
GSM1876796	breast cancer	serum	5.19886
GSM1876797	breast cancer	serum	5.50182
GSM1876798	breast cancer	serum	5.42794
GSM1876799	breast cancer	serum	4.61896
GSM1876800	breast cancer	serum	5.63798
GSM1876801	breast cancer	serum	5.32733
GSM1876802	breast cancer	serum	3.68222
GSM1876803	breast cancer	serum	5.27478
GSM1876804	breast cancer	serum	4.83095
GSM1876805	breast cancer	serum	4.27521
GSM1876806	breast cancer	serum	3.93076
GSM1876807	breast cancer	serum	5.34041
GSM1876808	breast cancer	serum	5.90111
GSM1876809	breast cancer	serum	3.20302
GSM1876810	breast cancer	serum	3.95373
GSM1876811	breast cancer	serum	5.29544
GSM1876812	breast cancer	serum	5.75803
GSM1876813	breast cancer	serum	4.96222
GSM1876814	breast cancer	serum	4.69539
GSM1876815	breast cancer	serum	3.6148
GSM1876816	breast cancer	serum	3.60682
GSM1876817	breast cancer	serum	2.41686
GSM1876818	breast cancer	serum	4.5443
GSM1876819	breast cancer	serum	3.76313
GSM1876820	breast cancer	serum	3.47303
GSM1876821	breast cancer	serum	3.88512
GSM1876822	breast cancer	serum	3.93248
GSM1876823	breast cancer	serum	3.97533
GSM1876824	breast cancer	serum	2.86621
GSM1876825	breast cancer	serum	2.67834
GSM1876826	breast cancer	serum	4.85784
GSM1876827	breast cancer	serum	4.33875
GSM1876828	breast cancer	serum	3.30434
GSM1876829	breast cancer	serum	4.65418
GSM1876830	breast cancer	serum	4.34943
GSM1876831	breast cancer	serum	3.55366
GSM1876832	breast cancer	serum	3.01348
GSM1876833	breast cancer	serum	4.29929
GSM1876834	breast cancer	serum	4.08419
GSM1876835	breast cancer	serum	4.95792
GSM1876836	breast cancer	serum	4.6772
GSM1876837	breast cancer	serum	3.11043
GSM1876838	breast cancer	serum	2.71638
GSM1876839	breast cancer	serum	4.07512
GSM1876840	breast cancer	serum	4.97148
GSM1876841	breast cancer	serum	3.40367
GSM1876842	breast cancer	serum	5.69704
GSM1876843	breast cancer	serum	3.27241
GSM1876844	breast cancer	serum	5.36627
GSM1876845	breast cancer	serum	3.53413
GSM1876846	breast cancer	serum	2.64808
GSM1876847	breast cancer	serum	3.6391
GSM1876848	breast cancer	serum	2.96925
GSM1876849	breast cancer	serum	4.92255
GSM1876850	breast cancer	serum	4.43703
GSM1876851	breast cancer	serum	6.08879
GSM1876852	breast cancer	serum	4.01556
GSM1876853	breast cancer	serum	3.30076
GSM1876854	breast cancer	serum	4.34434
GSM1876855	breast cancer	serum	3.45996
GSM1876856	breast cancer	serum	4.24689
GSM1876857	breast cancer	serum	5.27589
GSM1876858	breast cancer	serum	5.55455
GSM1876859	breast cancer	serum	4.01252
GSM1876860	breast cancer	serum	4.07959
GSM1876861	breast cancer	serum	4.80858
GSM1876862	breast cancer	serum	4.42309
GSM1876863	breast cancer	serum	5.88566
GSM1876864	breast cancer	serum	7.67525
GSM1876865	breast cancer	serum	7.02759
GSM1876866	breast cancer	serum	4.74147
GSM1876867	breast cancer	serum	5.42396
GSM1876868	breast cancer	serum	5.56776
GSM1876869	breast cancer	serum	5.47284
GSM1876870	breast cancer	serum	4.46203
GSM1876871	breast cancer	serum	4.96775
GSM1876872	breast cancer	serum	3.75452
GSM1876873	breast cancer	serum	4.17419
GSM1876874	breast cancer	serum	4.54522
GSM1876875	breast cancer	serum	5.29503
GSM1876876	breast cancer	serum	4.20893
GSM1876877	breast cancer	serum	5.43505
GSM1876878	breast cancer	serum	5.88741
GSM1876879	breast cancer	serum	5.34775
GSM1876880	breast cancer	serum	5.24471
GSM1876881	breast cancer	serum	5.63421
GSM1876882	breast cancer	serum	5.69639
GSM1876883	breast cancer	serum	5.40462
GSM1876884	breast cancer	serum	5.13966
GSM1876885	breast cancer	serum	5.60406
GSM1876886	breast cancer	serum	4.68443
GSM1876887	breast cancer	serum	3.24476
GSM1876888	breast cancer	serum	4.59177
GSM1876889	breast cancer	serum	5.1967
GSM1876890	breast cancer	serum	4.67841
GSM1876891	breast cancer	serum	5.25374
GSM1876892	breast cancer	serum	5.39033
GSM1876893	breast cancer	serum	5.30536
GSM1876894	breast cancer	serum	5.56671
GSM1876895	breast cancer	serum	6.17538
GSM1876896	breast cancer	serum	4.62219
GSM1876897	breast cancer	serum	6.36231
GSM1876898	breast cancer	serum	4.3767
GSM1876899	breast cancer	serum	3.72069
GSM1876900	breast cancer	serum	2.41389
GSM1876901	breast cancer	serum	4.33993
GSM1876902	breast cancer	serum	7.81131
GSM1876903	breast cancer	serum	7.63219
GSM1876904	breast cancer	serum	5.04765
GSM1876905	breast cancer	serum	5.33005
GSM1876906	breast cancer	serum	4.87839
GSM1876907	breast cancer	serum	6.64436
GSM1876908	breast cancer	serum	5.33337
GSM1876909	breast cancer	serum	5.25038
GSM1876910	breast cancer	serum	3.50966
GSM1876911	breast cancer	serum	6.46116
GSM1876912	breast cancer	serum	5.287
GSM1876913	breast cancer	serum	5.55421
GSM1876914	breast cancer	serum	6.06668
GSM1876915	breast cancer	serum	6.11824
GSM1876916	breast cancer	serum	5.00799
GSM1876917	breast cancer	serum	6.45756
GSM1876918	breast cancer	serum	4.95759
GSM1876919	breast cancer	serum	4.91203
GSM1876920	breast cancer	serum	5.48954
GSM1876921	breast cancer	serum	5.3151
GSM1876922	breast cancer	serum	4.93871
GSM1876923	breast cancer	serum	4.49767
GSM1876924	breast cancer	serum	2.94495
GSM1876925	breast cancer	serum	4.56095
GSM1876926	breast cancer	serum	6.08657
GSM1876927	breast cancer	serum	4.66454
GSM1876928	breast cancer	serum	3.04213
GSM1876929	breast cancer	serum	2.63534
GSM1876930	breast cancer	serum	2.63537
GSM1876931	breast cancer	serum	4.38169
GSM1876932	breast cancer	serum	4.99641
GSM1876933	breast cancer	serum	3.96162
GSM1876934	breast cancer	serum	4.28616
GSM1876935	breast cancer	serum	3.87962
GSM1876936	breast cancer	serum	3.74325
GSM1876937	breast cancer	serum	4.16987
GSM1876938	breast cancer	serum	3.74784
GSM1876939	breast cancer	serum	4.62535
GSM1876940	breast cancer	serum	4.51101
GSM1876941	breast cancer	serum	2.84471
GSM1876942	breast cancer	serum	3.28193
GSM1876943	breast cancer	serum	3.43016
GSM1876944	breast cancer	serum	3.55098
GSM1876945	breast cancer	serum	4.03637
GSM1876946	breast cancer	serum	3.16764
GSM1876947	breast cancer	serum	4.51588
GSM1876948	breast cancer	serum	5.32994
GSM1876949	breast cancer	serum	4.4501
GSM1876950	breast cancer	serum	3.99026
GSM1876951	breast cancer	serum	3.89347
GSM1876952	breast cancer	serum	5.47308
GSM1876953	breast cancer	serum	5.57173
GSM1876954	breast cancer	serum	4.6027
GSM1876955	breast cancer	serum	5.11337
GSM1876956	breast cancer	serum	4.78598
GSM1876957	breast cancer	serum	4.19243
GSM1876958	breast cancer	serum	3.48125
GSM1876959	breast cancer	serum	4.7197
GSM1876960	breast cancer	serum	4.04157
GSM1876961	breast cancer	serum	6.60629
GSM1876962	breast cancer	serum	5.00764
GSM1876963	breast cancer	serum	5.51475
GSM1876964	breast cancer	serum	4.87158
GSM1876965	breast cancer	serum	4.64275
GSM1876966	breast cancer	serum	5.09313
GSM1876967	breast cancer	serum	3.73962
GSM1876968	breast cancer	serum	5.60199
GSM1876969	breast cancer	serum	3.40291
GSM1876970	breast cancer	serum	4.05479
GSM1876971	breast cancer	serum	5.58977
GSM1876972	breast cancer	serum	4.76196
GSM1876973	breast cancer	serum	5.61408
GSM1876974	breast cancer	serum	5.46154
GSM1876975	breast cancer	serum	4.88098
GSM1876976	breast cancer	serum	5.04229
GSM1876977	breast cancer	serum	5.94698
GSM1876978	breast cancer	serum	4.29501
GSM1876979	breast cancer	serum	3.58973
GSM1876980	breast cancer	serum	4.4913
GSM1876981	breast cancer	serum	2.64121
GSM1876982	breast cancer	serum	5.41408
GSM1876983	breast cancer	serum	5.18706
GSM1876984	breast cancer	serum	6.15521
GSM1876985	breast cancer	serum	5.39648
GSM1876986	breast cancer	serum	5.06033
GSM1876987	breast cancer	serum	4.72885
GSM1876988	breast cancer	serum	3.9708
GSM1876989	breast cancer	serum	4.8094
GSM1876990	breast cancer	serum	4.77197
GSM1876991	breast cancer	serum	4.99997
GSM1876992	breast cancer	serum	4.33122
GSM1876993	breast cancer	serum	6.37237
GSM1876994	breast cancer	serum	6.33405
GSM1876995	breast cancer	serum	3.66173
GSM1876996	breast cancer	serum	3.66932
GSM1876997	breast cancer	serum	4.02501
GSM1876998	breast cancer	serum	3.98289
GSM1876999	breast cancer	serum	5.24757
GSM1877000	breast cancer	serum	4.68191
GSM1877001	breast cancer	serum	4.16412
GSM1877002	breast cancer	serum	5.54885
GSM1877003	breast cancer	serum	4.66331
GSM1877004	breast cancer	serum	6.57712
GSM1877005	breast cancer	serum	7.76741
GSM1877006	breast cancer	serum	4.57489
GSM1877007	breast cancer	serum	2.333
GSM1877008	breast cancer	serum	1.75186
GSM1877009	breast cancer	serum	0.930841
GSM1877010	breast cancer	serum	2.19855
GSM1877011	breast cancer	serum	2.35277
GSM1877012	breast cancer	serum	1.12252
GSM1877013	breast cancer	serum	0.354792
GSM1877014	breast cancer	serum	1.3947
GSM1877015	breast cancer	serum	2.67986
GSM1877016	breast cancer	serum	1.34047
GSM1877017	breast cancer	serum	1.27836
GSM1877018	breast cancer	serum	1.72038
GSM1877019	breast cancer	serum	2.08471
GSM1877020	breast cancer	serum	1.48246
GSM1877021	breast cancer	serum	4.20162
GSM1877022	breast cancer	serum	0.883159
GSM1877023	breast cancer	serum	4.01992
GSM1877024	breast cancer	serum	4.20959
GSM1877025	breast cancer	serum	4.15858
GSM1877026	breast cancer	serum	5.8162
GSM1877027	breast cancer	serum	5.09117
GSM1877028	breast cancer	serum	5.34643
GSM1877029	breast cancer	serum	3.36594
GSM1877030	breast cancer	serum	2.29353
GSM1877031	breast cancer	serum	3.78966
GSM1877032	breast cancer	serum	4.77438
GSM1877033	breast cancer	serum	3.42049
GSM1877034	breast cancer	serum	4.81329
GSM1877035	breast cancer	serum	4.18503
GSM1877036	breast cancer	serum	3.6703
GSM1877037	breast cancer	serum	4.5611
GSM1877038	breast cancer	serum	5.25009
GSM1877039	breast cancer	serum	3.65405
GSM1877040	breast cancer	serum	4.76024
GSM1877041	breast cancer	serum	5.823
GSM1877042	breast cancer	serum	4.42605
GSM1877043	breast cancer	serum	3.06389
GSM1877044	breast cancer	serum	5.14375
GSM1877045	breast cancer	serum	4.31136
GSM1877046	breast cancer	serum	2.93788
GSM1877047	breast cancer	serum	3.30455
GSM1877048	breast cancer	serum	3.74513
GSM1877049	breast cancer	serum	1.74921
GSM1877050	breast cancer	serum	5.35817
GSM1877051	breast cancer	serum	4.29007
GSM1877052	breast cancer	serum	4.84005
GSM1877053	breast cancer	serum	7.71408
GSM1877054	breast cancer	serum	3.99594
GSM1877055	breast cancer	serum	4.41255
GSM1877056	breast cancer	serum	4.43846
GSM1877057	breast cancer	serum	4.75103
GSM1877058	breast cancer	serum	4.24204
GSM1877059	breast cancer	serum	4.04652
GSM1877060	breast cancer	serum	5.41331
GSM1877061	breast cancer	serum	5.03057
GSM1877062	breast cancer	serum	5.3478
GSM1877063	breast cancer	serum	6.71407
GSM1877064	breast cancer	serum	6.3678
GSM1877065	breast cancer	serum	5.11179
GSM1877066	breast cancer	serum	4.36945
GSM1877067	breast cancer	serum	6.26111
GSM1877068	breast cancer	serum	4.32159
GSM1877069	breast cancer	serum	4.60353
GSM1877070	breast cancer	serum	5.3409
GSM1877071	breast cancer	serum	5.10688
GSM1877072	breast cancer	serum	5.21946
GSM1877073	breast cancer	serum	5.05722
GSM1877074	breast cancer	serum	5.60561
GSM1877075	breast cancer	serum	5.73834
GSM1877076	breast cancer	serum	5.04226
GSM1877077	breast cancer	serum	6.16998
GSM1877078	breast cancer	serum	5.77962
GSM1877079	breast cancer	serum	6.51492
GSM1877080	breast cancer	serum	5.53531
GSM1877081	breast cancer	serum	4.27423
GSM1877082	breast cancer	serum	4.34339
GSM1877083	breast cancer	serum	6.29789
GSM1877084	breast cancer	serum	4.19436
GSM1877085	breast cancer	serum	4.27381
GSM1877086	breast cancer	serum	2.79582
GSM1877087	breast cancer	serum	2.31612
GSM1877088	breast cancer	serum	4.3825
GSM1877089	breast cancer	serum	3.86979
GSM1877090	breast cancer	serum	4.27741
GSM1877091	breast cancer	serum	5.73901
GSM1877092	breast cancer	serum	4.70487
GSM1877093	breast cancer	serum	5.06352
GSM1877094	breast cancer	serum	4.66528
GSM1877095	breast cancer	serum	3.74522
GSM1877096	breast cancer	serum	4.6796
GSM1877097	breast cancer	serum	5.31211
GSM1877098	breast cancer	serum	5.63349
GSM1877099	breast cancer	serum	6.1176
GSM1877100	breast cancer	serum	6.52139
GSM1877101	breast cancer	serum	3.36757
GSM1877102	breast cancer	serum	4.19892
GSM1877103	breast cancer	serum	4.14045
GSM1877104	breast cancer	serum	6.19314
GSM1877105	breast cancer	serum	5.29431
GSM1877106	breast cancer	serum	5.16217
GSM1877107	breast cancer	serum	5.96261
GSM1877108	breast cancer	serum	4.44454
GSM1877109	breast cancer	serum	3.90352
GSM1877110	breast cancer	serum	4.14877
GSM1877111	breast cancer	serum	4.0846
GSM1877112	breast cancer	serum	6.2333
GSM1877113	breast cancer	serum	4.92399
GSM1877114	breast cancer	serum	5.70705
GSM1877115	breast cancer	serum	4.69237
GSM1877116	breast cancer	serum	3.72681
GSM1877117	breast cancer	serum	4.42333
GSM1877118	breast cancer	serum	4.71665
GSM1877119	breast cancer	serum	4.72843
GSM1877120	breast cancer	serum	5.27415
GSM1877121	breast cancer	serum	3.71027
GSM1877122	breast cancer	serum	5.94489
GSM1877123	breast cancer	serum	5.46838
GSM1877124	breast cancer	serum	3.65295
GSM1877125	breast cancer	serum	5.51176
GSM1877126	breast cancer	serum	4.80264
GSM1877127	breast cancer	serum	3.82975
GSM1877128	breast cancer	serum	4.15997
GSM1877129	breast cancer	serum	2.46092
GSM1877130	breast cancer	serum	4.34274
GSM1877131	breast cancer	serum	6.49477
GSM1877132	breast cancer	serum	3.59941
GSM1877133	breast cancer	serum	2.65572
GSM1877134	breast cancer	serum	3.97121
GSM1877135	breast cancer	serum	2.61112
GSM1877136	breast cancer	serum	3.80233
GSM1877137	breast cancer	serum	6.89123
GSM1877138	breast cancer	serum	4.02206
GSM1877139	breast cancer	serum	4.23033
GSM1877140	breast cancer	serum	4.41926
GSM1877141	breast cancer	serum	2.69339
GSM1877142	breast cancer	serum	3.11915
GSM1877143	breast cancer	serum	3.79408
GSM1877144	breast cancer	serum	5.232
GSM1877145	breast cancer	serum	4.86783
GSM1877146	breast cancer	serum	4.83509
GSM1877147	breast cancer	serum	4.93296
GSM1877148	breast cancer	serum	4.68301
GSM1877149	breast cancer	serum	5.73156
GSM1877150	breast cancer	serum	5.47187
GSM1877151	breast cancer	serum	5.74943
GSM1877152	breast cancer	serum	3.72777
GSM1877153	breast cancer	serum	3.96921
GSM1877154	breast cancer	serum	5.06979
GSM1877155	breast cancer	serum	3.40915
GSM1877156	breast cancer	serum	3.31131
GSM1877157	breast cancer	serum	3.48182
GSM1877158	breast cancer	serum	4.14434
GSM1877159	breast cancer	serum	2.79939
GSM1877160	breast cancer	serum	2.6777
GSM1877161	breast cancer	serum	3.47299
GSM1877162	breast cancer	serum	3.46044
GSM1877163	breast cancer	serum	3.08562
GSM1877164	breast cancer	serum	2.90967
GSM1877165	breast cancer	serum	3.27344
GSM1877166	breast cancer	serum	3.74378
GSM1877167	breast cancer	serum	5.24489
GSM1877168	breast cancer	serum	3.94885
GSM1877169	breast cancer	serum	4.27397
GSM1877170	breast cancer	serum	4.25023
GSM1877171	breast cancer	serum	4.95141
GSM1877172	breast cancer	serum	4.75276
GSM1877173	breast cancer	serum	4.25837
GSM1877174	breast cancer	serum	4.52641
GSM1877175	breast cancer	serum	4.83621
GSM1877176	breast cancer	serum	4.56078
GSM1877177	breast cancer	serum	4.9189
GSM1877178	breast cancer	serum	5.62741
GSM1877179	breast cancer	serum	4.18178
GSM1877180	breast cancer	serum	4.17762
GSM1877181	breast cancer	serum	4.61128
GSM1877182	breast cancer	serum	2.82886
GSM1877183	breast cancer	serum	5.71958
GSM1877184	breast cancer	serum	6.03852
GSM1877185	breast cancer	serum	8.21997
GSM1877186	breast cancer	serum	3.80442
GSM1877187	breast cancer	serum	3.5358
GSM1877188	breast cancer	serum	1.92992
GSM1877189	breast cancer	serum	4.35048
GSM1877190	breast cancer	serum	5.14138
GSM1877191	breast cancer	serum	3.89844
GSM1877192	breast cancer	serum	4.73496
GSM1877193	breast cancer	serum	4.0707
GSM1877194	breast cancer	serum	4.96721
GSM1877195	breast cancer	serum	4.05616
GSM1877196	breast cancer	serum	3.77381
GSM1877197	breast cancer	serum	3.76172
GSM1877198	breast cancer	serum	2.70294
GSM1877199	breast cancer	serum	3.17038
GSM1877200	breast cancer	serum	3.62669
GSM1877201	breast cancer	serum	2.86602
GSM1877202	breast cancer	serum	4.14324
GSM1877203	breast cancer	serum	6.54229
GSM1877204	breast cancer	serum	4.42177
GSM1877205	breast cancer	serum	5.67234
GSM1877206	breast cancer	serum	3.79895
GSM1877207	breast cancer	serum	4.6024
GSM1877208	breast cancer	serum	4.17755
GSM1877209	breast cancer	serum	3.70858
GSM1877210	breast cancer	serum	4.94314
GSM1877211	breast cancer	serum	5.25231
GSM1877212	breast cancer	serum	6.42025
GSM1877213	breast cancer	serum	5.0702
GSM1877214	breast cancer	serum	4.29864
GSM1877215	breast cancer	serum	5.30909
GSM1877216	breast cancer	serum	3.38627
GSM1877217	breast cancer	serum	3.91434
GSM1877218	breast cancer	serum	5.69915
GSM1877219	breast cancer	serum	4.2544
GSM1877220	breast cancer	serum	4.41412
GSM1877221	breast cancer	serum	4.83182
GSM1877222	breast cancer	serum	2.93784
GSM1877223	breast cancer	serum	4.09235
GSM1877224	breast cancer	serum	3.89198
GSM1877225	breast cancer	serum	4.39999
GSM1877226	breast cancer	serum	8.44772
GSM1877227	breast cancer	serum	5.1323
GSM1877228	breast cancer	serum	3.6641
GSM1877229	breast cancer	serum	5.18873
GSM1877230	breast cancer	serum	8.04173
GSM1877231	breast cancer	serum	5.11538
GSM1877232	breast cancer	serum	2.8472
GSM1877233	breast cancer	serum	3.63641
GSM1877234	breast cancer	serum	3.41186
GSM1877235	breast cancer	serum	5.58379
GSM1877236	breast cancer	serum	5.98371
GSM1877237	breast cancer	serum	1.99859
GSM1877238	breast cancer	serum	3.56956
GSM1877239	breast cancer	serum	3.95411
GSM1877240	breast cancer	serum	6.87689
GSM1877241	breast cancer	serum	4.6998
GSM1877242	breast cancer	serum	3.13799
GSM1877243	breast cancer	serum	4.35466
GSM1877244	breast cancer	serum	4.07149
GSM1877245	breast cancer	serum	4.9164
GSM1877246	breast cancer	serum	5.45349
GSM1877247	breast cancer	serum	4.10303
GSM1877248	breast cancer	serum	3.42785
GSM1877249	breast cancer	serum	3.09518
GSM1877250	breast cancer	serum	5.87373
GSM1877251	breast cancer	serum	4.92715
GSM1877252	breast cancer	serum	4.45918
GSM1877253	breast cancer	serum	4.13265
GSM1877254	breast cancer	serum	4.31314
GSM1877255	breast cancer	serum	3.11564
GSM1877256	breast cancer	serum	4.59602
GSM1877257	breast cancer	serum	4.22677
GSM1877258	breast cancer	serum	5.0032
GSM1877259	breast cancer	serum	3.807
GSM1877260	breast cancer	serum	4.96312
GSM1877261	breast cancer	serum	3.85034
GSM1877262	breast cancer	serum	5.16651
GSM1877263	breast cancer	serum	3.87402
GSM1877264	breast cancer	serum	4.4388
GSM1877265	breast cancer	serum	4.19847
GSM1877266	breast cancer	serum	4.59499
GSM1877267	breast cancer	serum	4.29239
GSM1877268	breast cancer	serum	4.2764
GSM1877269	breast cancer	serum	4.5013
GSM1877270	breast cancer	serum	5.03373
GSM1877271	breast cancer	serum	3.7648
GSM1877272	breast cancer	serum	4.05372
GSM1877273	breast cancer	serum	5.57351
GSM1877274	breast cancer	serum	4.84671
GSM1877275	breast cancer	serum	4.6628
GSM1877276	breast cancer	serum	6.49168
GSM1877277	breast cancer	serum	4.74442
GSM1877278	breast cancer	serum	5.45485
GSM1877279	breast cancer	serum	5.87564
GSM1877280	breast cancer	serum	4.5712
GSM1877281	breast cancer	serum	4.25255
GSM1877282	breast cancer	serum	5.32164
GSM1877283	breast cancer	serum	4.5894
GSM1877284	breast cancer	serum	3.87857
GSM1877285	breast cancer	serum	5.10134
GSM1877286	breast cancer	serum	3.50868
GSM1877287	breast cancer	serum	5.18943
GSM1877288	breast cancer	serum	4.89488
GSM1877289	breast cancer	serum	4.49432
GSM1877290	breast cancer	serum	4.51104
GSM1877291	breast cancer	serum	4.46832
GSM1877292	breast cancer	serum	4.47834
GSM1877293	breast cancer	serum	5.81001
GSM1877294	breast cancer	serum	3.50663
GSM1877295	breast cancer	serum	4.67374
GSM1877296	breast cancer	serum	3.34204
GSM1877297	breast cancer	serum	3.86481
GSM1877298	breast cancer	serum	3.35969
GSM1877299	breast cancer	serum	3.97825
GSM1877300	breast cancer	serum	3.90114
GSM1877301	breast cancer	serum	4.50743
GSM1877302	breast cancer	serum	4.31357
GSM1877303	breast cancer	serum	4.04936
GSM1877304	breast cancer	serum	4.33519
GSM1877305	breast cancer	serum	4.26265
GSM1877306	breast cancer	serum	4.42833
GSM1877307	breast cancer	serum	4.09151
GSM1877308	breast cancer	serum	4.14864
GSM1877309	breast cancer	serum	3.01246
GSM1877310	breast cancer	serum	4.88653
GSM1877311	breast cancer	serum	5.04369
GSM1877312	breast cancer	serum	4.16294
GSM1877313	breast cancer	serum	4.14693
GSM1877314	breast cancer	serum	3.37558
GSM1877315	breast cancer	serum	3.66887
GSM1877316	breast cancer	serum	4.41813
GSM1877317	breast cancer	serum	3.89723
GSM1877318	breast cancer	serum	3.48736
GSM1877319	breast cancer	serum	3.98766
GSM1877320	breast cancer	serum	3.57932
GSM1877321	breast cancer	serum	4.98635
GSM1877322	breast cancer	serum	4.45475
GSM1877323	breast cancer	serum	4.96579
GSM1877324	breast cancer	serum	4.83537
GSM1877325	breast cancer	serum	4.2991
GSM1877326	breast cancer	serum	4.57538
GSM1877327	breast cancer	serum	6.71973
GSM1877328	breast cancer	serum	6.03647
GSM1877329	breast cancer	serum	4.74502
GSM1877330	breast cancer	serum	5.50518
GSM1877331	breast cancer	serum	5.3576
GSM1877332	breast cancer	serum	6.21995
GSM1877333	breast cancer	serum	4.23613
GSM1877334	breast cancer	serum	8.32019
GSM1877335	breast cancer	serum	5.66625
GSM1877336	breast cancer	serum	6.87104
GSM1877337	breast cancer	serum	5.74866
GSM1877338	breast cancer	serum	5.13035
GSM1877339	breast cancer	serum	4.24763
GSM1877340	breast cancer	serum	3.61222
GSM1877341	breast cancer	serum	7.46897
GSM1877342	breast cancer	serum	4.43284
GSM1877343	breast cancer	serum	4.56011
GSM1877344	breast cancer	serum	3.91215
GSM1877345	breast cancer	serum	5.13568
GSM1877346	breast cancer	serum	8.2852
GSM1877347	breast cancer	serum	5.99339
GSM1877348	breast cancer	serum	4.13251
GSM1877349	breast cancer	serum	4.62441
GSM1877350	breast cancer	serum	4.54921
GSM1877351	breast cancer	serum	3.48381
GSM1877352	breast cancer	serum	6.65163
GSM1877353	breast cancer	serum	4.64765
GSM1877354	breast cancer	serum	4.13719
GSM1877355	breast cancer	serum	5.87614
GSM1877356	breast cancer	serum	6.88865
GSM1877357	breast cancer	serum	5.86584
GSM1877358	breast cancer	serum	6.34584
GSM1877359	breast cancer	serum	4.89298
GSM1877360	breast cancer	serum	5.11103
GSM1877361	breast cancer	serum	3.63913
GSM1877362	breast cancer	serum	4.84315
GSM1877363	breast cancer	serum	4.37332
GSM1877364	breast cancer	serum	3.90109
GSM1877365	breast cancer	serum	3.13899
GSM1877366	breast cancer	serum	4.33655
GSM1877367	breast cancer	serum	4.39282
GSM1877368	breast cancer	serum	3.02128
GSM1877369	breast cancer	serum	2.8158
GSM1877370	breast cancer	serum	4.64253
GSM1877371	breast cancer	serum	3.79654
GSM1877372	breast cancer	serum	3.90866
GSM1877373	breast cancer	serum	3.93047
GSM1877374	breast cancer	serum	6.54958
GSM1877375	breast cancer	serum	4.35258
GSM1877376	breast cancer	serum	4.87299
GSM1877377	breast cancer	serum	6.88525
GSM1877378	breast cancer	serum	5.71663
GSM1877379	breast cancer	serum	4.30908
GSM1877380	breast cancer	serum	4.44146
GSM1877381	breast cancer	serum	4.43998
GSM1877382	breast cancer	serum	5.24863
GSM1877383	breast cancer	serum	4.88605
GSM1877384	breast cancer	serum	4.89226
GSM1877385	breast cancer	serum	3.99211
GSM1877386	breast cancer	serum	3.25564
GSM1877387	breast cancer	serum	5.60945
GSM1877388	breast cancer	serum	4.00486
GSM1877389	breast cancer	serum	3.41531
GSM1877390	breast cancer	serum	4.70444
GSM1877391	breast cancer	serum	4.86255
GSM1877392	breast cancer	serum	3.79138
GSM1877393	breast cancer	serum	5.62009
GSM1877394	breast cancer	serum	4.63575
GSM1877395	breast cancer	serum	5.56046
GSM1877396	breast cancer	serum	4.9803
GSM1877397	breast cancer	serum	4.46096
GSM1877398	breast cancer	serum	3.97869
GSM1877399	breast cancer	serum	3.32037
GSM1877400	breast cancer	serum	4.26442
GSM1877401	breast cancer	serum	3.56206
GSM1877402	breast cancer	serum	4.97772
GSM1877403	breast cancer	serum	3.22908
GSM1877404	breast cancer	serum	4.85601
GSM1877405	breast cancer	serum	5.49028
GSM1877406	breast cancer	serum	5.0208
GSM1877407	breast cancer	serum	3.89856
GSM1877408	breast cancer	serum	4.58586
GSM1877409	breast cancer	serum	4.87478
GSM1877410	breast cancer	serum	5.23801
GSM1877411	breast cancer	serum	3.83564
GSM1877412	breast cancer	serum	4.64135
GSM1877413	breast cancer	serum	4.5576
GSM1877414	breast cancer	serum	3.38869
GSM1877415	breast cancer	serum	4.11271
GSM1877416	breast cancer	serum	4.58766
GSM1877417	breast cancer	serum	5.2557
GSM1877418	breast cancer	serum	2.34472
GSM1877419	breast cancer	serum	3.91015
GSM1877420	breast cancer	serum	4.37528
GSM1877421	breast cancer	serum	4.55406
GSM1877422	breast cancer	serum	4.45603
GSM1877423	breast cancer	serum	4.32551
GSM1877424	breast cancer	serum	5.37484
GSM1877425	breast cancer	serum	5.39472
GSM1877426	breast cancer	serum	5.45517
GSM1877427	breast cancer	serum	3.92167
GSM1877428	breast cancer	serum	4.76071
GSM1877429	breast cancer	serum	6.42937
GSM1877430	breast cancer	serum	4.59543
GSM1877431	breast cancer	serum	5.93368
GSM1877432	breast cancer	serum	6.29327
GSM1877433	breast cancer	serum	4.4708
GSM1877434	breast cancer	serum	3.1086
GSM1877435	breast cancer	serum	4.87136
GSM1877436	breast cancer	serum	4.96549
GSM1877437	breast cancer	serum	4.32804
GSM1877438	breast cancer	serum	5.30711
GSM1877439	breast cancer	serum	4.78633
GSM1877440	breast cancer	serum	4.1085
GSM1877441	breast cancer	serum	4.87451
GSM1877442	breast cancer	serum	5.825
GSM1877443	breast cancer	serum	5.71569
GSM1877444	breast cancer	serum	5.30883
GSM1877445	breast cancer	serum	3.12306
GSM1877446	breast cancer	serum	3.31776
GSM1877447	breast cancer	serum	3.69011
GSM1877448	breast cancer	serum	3.20941
GSM1877449	breast cancer	serum	4.2785
GSM1877450	breast cancer	serum	3.84825
GSM1877451	breast cancer	serum	4.74452
GSM1877452	breast cancer	serum	6.10581
GSM1877453	breast cancer	serum	4.3459
GSM1877454	breast cancer	serum	3.792
GSM1877455	breast cancer	serum	5.41344
GSM1877456	breast cancer	serum	4.02174
GSM1877457	breast cancer	serum	3.5352
GSM1877458	breast cancer	serum	4.82906
GSM1877459	breast cancer	serum	3.9095
GSM1877460	breast cancer	serum	3.74931
GSM1877461	breast cancer	serum	4.69079
GSM1877462	breast cancer	serum	5.36915
GSM1877463	breast cancer	serum	2.45947
GSM1877464	breast cancer	serum	3.15665
GSM1877465	breast cancer	serum	6.26242
GSM1877466	breast cancer	serum	5.49949
GSM1877467	breast cancer	serum	5.09818
GSM1877468	breast cancer	serum	3.99222
GSM1877469	breast cancer	serum	4.80524
GSM1877470	breast cancer	serum	4.69898
GSM1877471	breast cancer	serum	3.29439
GSM1877472	breast cancer	serum	2.80499
GSM1877473	breast cancer	serum	4.09654
GSM1877474	breast cancer	serum	4.79241
GSM1877475	breast cancer	serum	4.96121
GSM1877476	breast cancer	serum	4.27213
GSM1877477	breast cancer	serum	4.7625
GSM1877478	breast cancer	serum	3.67916
GSM1877479	breast cancer	serum	3.54578
GSM1877480	breast cancer	serum	4.89536
GSM1877481	breast cancer	serum	2.39973
GSM1877482	breast cancer	serum	4.30029
GSM1877483	breast cancer	serum	2.85433
GSM1877484	breast cancer	serum	4.20544
GSM1877485	breast cancer	serum	2.98037
GSM1877486	breast cancer	serum	3.12242
GSM1877487	breast cancer	serum	2.90558
GSM1877488	breast cancer	serum	3.91279
GSM1877489	breast cancer	serum	3.95158
GSM1877490	breast cancer	serum	3.54079
GSM1877491	breast cancer	serum	5.31461
GSM1877492	breast cancer	serum	4.63491
GSM1877493	breast cancer	serum	5.09636
GSM1877494	breast cancer	serum	4.89515
GSM1877495	breast cancer	serum	3.19606
GSM1877496	breast cancer	serum	2.66365
GSM1877497	breast cancer	serum	3.11788
GSM1877498	breast cancer	serum	4.32009
GSM1877499	breast cancer	serum	4.78691
GSM1877500	breast cancer	serum	4.22269
GSM1877501	breast cancer	serum	5.04078
GSM1877502	breast cancer	serum	3.46505
GSM1877503	breast cancer	serum	3.91303
GSM1877504	breast cancer	serum	3.78004
GSM1877505	breast cancer	serum	4.27316
GSM1877506	breast cancer	serum	4.22094
GSM1877507	breast cancer	serum	3.16546
GSM1877508	breast cancer	serum	1.40055
GSM1877509	breast cancer	serum	1.8096
GSM1877510	breast cancer	serum	4.13334
GSM1877511	breast cancer	serum	4.35001
GSM1877512	breast cancer	serum	2.76109
GSM1877513	breast cancer	serum	3.28442
GSM1877514	breast cancer	serum	4.53029
GSM1877515	breast cancer	serum	3.91199
GSM1877516	breast cancer	serum	4.33046
GSM1877517	breast cancer	serum	4.50021
GSM1877518	breast cancer	serum	3.98903
GSM1877519	breast cancer	serum	4.03763
GSM1877520	breast cancer	serum	4.41786
GSM1877521	breast cancer	serum	2.80303
GSM1877522	breast cancer	serum	3.52146
GSM1877523	breast cancer	serum	4.5505
GSM1877524	breast cancer	serum	4.37767
GSM1877525	breast cancer	serum	4.08947
GSM1877526	breast cancer	serum	5.14894
GSM1877527	breast cancer	serum	5.00563
GSM1877528	breast cancer	serum	4.15802
GSM1877529	breast cancer	serum	3.6165
GSM1877530	breast cancer	serum	4.71308
GSM1877531	breast cancer	serum	3.55594
GSM1877532	breast cancer	serum	2.75588
GSM1877533	breast cancer	serum	4.09729
GSM1877534	breast cancer	serum	3.75941
GSM1877535	breast cancer	serum	3.42378
GSM1877536	breast cancer	serum	4.81061
GSM1877537	breast cancer	serum	4.19136
GSM1877538	breast cancer	serum	4.85047
GSM1877539	breast cancer	serum	3.96911
GSM1877540	breast cancer	serum	3.39588
GSM1877541	breast cancer	serum	4.28899
GSM1877542	breast cancer	serum	4.98734
GSM1877543	breast cancer	serum	4.57166
GSM1877544	breast cancer	serum	3.89469
GSM1877545	breast cancer	serum	3.51353
GSM1877546	breast cancer	serum	3.9589
GSM1877547	breast cancer	serum	4.03426
GSM1877548	breast cancer	serum	4.62537
GSM1877549	breast cancer	serum	4.99594
GSM1877550	breast cancer	serum	3.35288
GSM1877551	breast cancer	serum	4.79561
GSM1877552	breast cancer	serum	4.06808
GSM1877553	breast cancer	serum	4.63828
GSM1877554	breast cancer	serum	3.3352
GSM1877555	breast cancer	serum	5.74417
GSM1877556	breast cancer	serum	4.9608
GSM1877557	breast cancer	serum	3.30426
GSM1877558	breast cancer	serum	4.48996
GSM1877559	breast cancer	serum	4.7374
GSM1877560	breast cancer	serum	3.71644
GSM1877561	breast cancer	serum	4.09913
GSM1877562	breast cancer	serum	4.34874
GSM1877563	breast cancer	serum	4.41728
GSM1877564	breast cancer	serum	3.47034
GSM1877565	breast cancer	serum	4.88054
GSM1877566	breast cancer	serum	3.86631
GSM1877567	breast cancer	serum	3.88693
GSM1877568	breast cancer	serum	4.66559
GSM1877569	breast cancer	serum	5.22716
GSM1877570	breast cancer	serum	4.36903
GSM1877571	breast cancer	serum	5.18436
GSM1877572	breast cancer	serum	2.0432
GSM1877573	breast cancer	serum	4.64907
GSM1877574	breast cancer	serum	2.38394
GSM1877575	breast cancer	serum	4.05802
GSM1877576	breast cancer	serum	3.38736
GSM1877577	breast cancer	serum	4.61635
GSM1877578	breast cancer	serum	3.1829
GSM1877579	breast cancer	serum	3.19789
GSM1877580	breast cancer	serum	4.879
GSM1877581	breast cancer	serum	5.34904
GSM1877582	breast cancer	serum	5.76171
GSM1877583	breast cancer	serum	5.16619
GSM1877584	breast cancer	serum	4.99332
GSM1877585	breast cancer	serum	5.79868
GSM1877586	breast cancer	serum	5.72034
GSM1877587	breast cancer	serum	5.2585
GSM1877588	breast cancer	serum	3.91648
GSM1877589	breast cancer	serum	3.28922
GSM1877590	breast cancer	serum	5.42184
GSM1877591	breast cancer	serum	3.81292
GSM1877592	breast cancer	serum	6.30539
GSM1877593	breast cancer	serum	4.94054
GSM1877594	breast cancer	serum	4.80094
GSM1877595	breast cancer	serum	5.04832
GSM1877596	breast cancer	serum	4.12312
GSM1877597	breast cancer	serum	3.29922
GSM1877598	breast cancer	serum	5.85961
GSM1877599	breast cancer	serum	6.10756
GSM1877600	breast cancer	serum	4.53767
GSM1877601	breast cancer	serum	4.30226
GSM1877602	breast cancer	serum	4.78332
GSM1877603	breast cancer	serum	4.79282
GSM1877604	breast cancer	serum	4.89603
GSM1877605	breast cancer	serum	4.86371
GSM1877606	breast cancer	serum	4.3022
GSM1877607	breast cancer	serum	5.33662
GSM1877608	breast cancer	serum	4.30098
GSM1877609	breast cancer	serum	4.54731
GSM1877610	breast cancer	serum	4.96048
GSM1877611	breast cancer	serum	3.90381
GSM1877612	breast cancer	serum	4.78378
GSM1877613	breast cancer	serum	4.57636
GSM1877614	breast cancer	serum	4.81577
GSM1877615	breast cancer	serum	4.59029
GSM1877616	breast cancer	serum	4.47651
GSM1877617	breast cancer	serum	5.89094
GSM1877618	breast cancer	serum	2.21635
GSM1877619	breast cancer	serum	1.95484
GSM1877620	breast cancer	serum	1.6937
GSM1877621	breast cancer	serum	1.58991
GSM1877622	breast cancer	serum	2.62745
GSM1877623	breast cancer	serum	1.88007
GSM1877624	breast cancer	serum	0.290587
GSM1877625	breast cancer	serum	0.928362
GSM1877626	breast cancer	serum	0.892122
GSM1877627	breast cancer	serum	2.68435
GSM1877628	breast cancer	serum	1.84031
GSM1877629	breast cancer	serum	2.07409
GSM1877630	breast cancer	serum	2.26725
GSM1877631	breast cancer	serum	1.6035
GSM1877632	breast cancer	serum	2.22301
GSM1877633	breast cancer	serum	3.17067
GSM1877634	breast cancer	serum	2.29821
GSM1877635	breast cancer	serum	2.7391
GSM1877636	breast cancer	serum	2.72408
GSM1877637	breast cancer	serum	1.73694
GSM1877638	breast cancer	serum	2.43233
GSM1877639	breast cancer	serum	2.41028
GSM1877640	breast cancer	serum	2.70007
GSM1877641	breast cancer	serum	4.83216
GSM1877642	breast cancer	serum	3.04534
GSM1877643	breast cancer	serum	1.75425
GSM1877644	breast cancer	serum	2.71594
GSM1877645	breast cancer	serum	3.06628
GSM1877646	breast cancer	serum	2.77695
GSM1877647	breast cancer	serum	2.69881
GSM1877648	breast cancer	serum	2.09689
GSM1877649	breast cancer	serum	2.52354
GSM1877650	breast cancer	serum	1.01856
GSM1877651	breast cancer	serum	2.56588
GSM1877652	breast cancer	serum	2.0558
GSM1877653	breast cancer	serum	2.53587
GSM1877654	breast cancer	serum	3.26464
GSM1877655	breast cancer	serum	1.68172
GSM1877656	breast cancer	serum	2.05621
GSM1877657	breast cancer	serum	1.51496
GSM1877658	breast cancer	serum	1.8609
GSM1877659	breast cancer	serum	2.02811
GSM1877660	breast cancer	serum	2.20165
GSM1877661	breast cancer	serum	2.54
GSM1877662	breast cancer	serum	2.34714
GSM1877663	breast cancer	serum	2.34787
GSM1877664	breast cancer	serum	1.0227
GSM1877665	breast cancer	serum	1.53173
GSM1877666	breast cancer	serum	2.48213
GSM1877667	breast cancer	serum	2.64528
GSM1877668	breast cancer	serum	2.62569
GSM1877669	breast cancer	serum	1.87119
GSM1877670	breast cancer	serum	2.08635
GSM1877671	breast cancer	serum	1.89566
GSM1877672	breast cancer	serum	1.81813
GSM1877673	breast cancer	serum	1.51583
GSM1877674	breast cancer	serum	0.797887
GSM1877675	breast cancer	serum	0.869345
GSM1877676	breast cancer	serum	0.119433
GSM1877677	breast cancer	serum	1.85775
GSM1877678	breast cancer	serum	1.81493
GSM1877679	breast cancer	serum	1.36624
GSM1877680	breast cancer	serum	1.00699
GSM1877681	breast cancer	serum	1.05793
GSM1877682	breast cancer	serum	2.14426
GSM1877683	breast cancer	serum	0.0680277
GSM1877684	breast cancer	serum	0.551244
GSM1877685	breast cancer	serum	1.83151
GSM1877686	breast cancer	serum	1.04255
GSM1877687	breast cancer	serum	1.06717
GSM1877688	breast cancer	serum	2.90213
GSM1877689	breast cancer	serum	2.62592
GSM1877690	breast cancer	serum	1.45504
GSM1877691	breast cancer	serum	1.63227
GSM1877692	non-cancer	serum	1.34424
GSM1877693	non-cancer	serum	1.27717
GSM1877694	non-cancer	serum	1.44701
GSM1877695	non-cancer	serum	1.40006
GSM1877696	non-cancer	serum	0.85004
GSM1877697	non-cancer	serum	0.898406
GSM1877698	non-cancer	serum	2.43023
GSM1877699	non-cancer	serum	2.37432
GSM1877700	non-cancer	serum	2.37945
GSM1877701	non-cancer	serum	0.474728
GSM1877702	non-cancer	serum	1.07742
GSM1877703	non-cancer	serum	2.56991
GSM1877704	non-cancer	serum	1.8531
GSM1877705	non-cancer	serum	3.4647
GSM1877706	non-cancer	serum	1.9694
GSM1877707	non-cancer	serum	1.88507
GSM1877708	non-cancer	serum	2.14753
GSM1877709	non-cancer	serum	2.18944
GSM1877710	non-cancer	serum	1.63239
GSM1877711	non-cancer	serum	1.17134
GSM1877712	non-cancer	serum	0.523256
GSM1877713	non-cancer	serum	1.7189
GSM1877714	non-cancer	serum	1.11519
GSM1877715	non-cancer	serum	1.4188
GSM1877716	non-cancer	serum	2.39055
GSM1877717	non-cancer	serum	1.81353
GSM1877718	non-cancer	serum	1.12049
GSM1877719	non-cancer	serum	1.09692
GSM1877720	non-cancer	serum	1.63542
GSM1877721	non-cancer	serum	1.75972
GSM1877722	non-cancer	serum	1.87284
GSM1877723	non-cancer	serum	0.654158
GSM1877724	non-cancer	serum	1.32285
GSM1877725	non-cancer	serum	2.26132
GSM1877726	non-cancer	serum	2.39322
GSM1877727	non-cancer	serum	2.20633
GSM1877728	non-cancer	serum	0.236996
GSM1877729	non-cancer	serum	1.75921
GSM1877730	non-cancer	serum	1.13338
GSM1877731	non-cancer	serum	0.807134
GSM1877732	non-cancer	serum	2.57274
GSM1877733	non-cancer	serum	2.1586
GSM1877734	non-cancer	serum	1.76477
GSM1877735	non-cancer	serum	2.73901
GSM1877736	non-cancer	serum	2.46702
GSM1877737	non-cancer	serum	1.26082
GSM1877738	non-cancer	serum	2.31007
GSM1877739	non-cancer	serum	1.40812
GSM1877740	non-cancer	serum	1.34307
GSM1877741	non-cancer	serum	4.01994
GSM1877742	non-cancer	serum	2.29339
GSM1877743	non-cancer	serum	2.12841
GSM1877744	non-cancer	serum	1.52363
GSM1877745	non-cancer	serum	1.30795
GSM1877746	non-cancer	serum	2.55106
GSM1877747	non-cancer	serum	1.97401
GSM1877748	non-cancer	serum	2.50191
GSM1877749	non-cancer	serum	0.858761
GSM1877750	non-cancer	serum	1.17287
GSM1877751	non-cancer	serum	1.27674
GSM1877752	non-cancer	serum	1.70973
GSM1877753	non-cancer	serum	0.810931
GSM1877754	non-cancer	serum	1.75621
GSM1877755	non-cancer	serum	1.82615
GSM1877756	non-cancer	serum	1.6557
GSM1877757	non-cancer	serum	1.06096
GSM1877758	non-cancer	serum	0.52345
GSM1877759	non-cancer	serum	1.6801
GSM1877760	non-cancer	serum	2.22474
GSM1877761	non-cancer	serum	2.23195
GSM1877762	non-cancer	serum	0.597845
GSM1877763	non-cancer	serum	2.20593
GSM1877764	non-cancer	serum	1.32782
GSM1877765	non-cancer	serum	0.449513
GSM1877766	non-cancer	serum	2.48143
GSM1877767	non-cancer	serum	1.87412
GSM1877768	non-cancer	serum	2.59478
GSM1877769	non-cancer	serum	2.71363
GSM1877770	non-cancer	serum	1.59356
GSM1877771	non-cancer	serum	1.3891
GSM1877772	non-cancer	serum	0.933052
GSM1877773	non-cancer	serum	0.940949
GSM1877774	non-cancer	serum	1.18
GSM1877775	non-cancer	serum	0.777253
GSM1877776	non-cancer	serum	1.99717
GSM1877777	non-cancer	serum	1.43096
GSM1877778	non-cancer	serum	1.08131
GSM1877779	non-cancer	serum	1.30754
GSM1877780	non-cancer	serum	1.78639
GSM1877781	non-cancer	serum	1.61085
GSM1877782	non-cancer	serum	0.28851
GSM1877783	non-cancer	serum	2.05723
GSM1877784	non-cancer	serum	2.21721
GSM1877785	non-cancer	serum	2.42533
GSM1877786	non-cancer	serum	1.56734
GSM1877787	non-cancer	serum	1.89563
GSM1877788	non-cancer	serum	1.84107
GSM1877789	non-cancer	serum	1.70076
GSM1877790	non-cancer	serum	3.47513
GSM1877791	non-cancer	serum	1.9819
GSM1877792	non-cancer	serum	0.833092
GSM1877793	non-cancer	serum	1.82842
GSM1877794	non-cancer	serum	0.733125
GSM1877795	non-cancer	serum	0.97988
GSM1877796	non-cancer	serum	1.00724
GSM1877797	non-cancer	serum	2.05907
GSM1877798	non-cancer	serum	1.5258
GSM1877799	non-cancer	serum	3.11757
GSM1877800	non-cancer	serum	1.66267
GSM1877801	non-cancer	serum	1.88878
GSM1877802	non-cancer	serum	0.922613
GSM1877803	non-cancer	serum	2.22841
GSM1877804	non-cancer	serum	0.980194
GSM1877805	non-cancer	serum	1.00912
GSM1877806	non-cancer	serum	1.77713
GSM1877807	non-cancer	serum	2.7745
GSM1877808	non-cancer	serum	1.63867
GSM1877809	non-cancer	serum	2.15592
GSM1877810	non-cancer	serum	1.67527
GSM1877811	non-cancer	serum	1.74172
GSM1877812	non-cancer	serum	3.17901
GSM1877813	non-cancer	serum	2.76614
GSM1877814	non-cancer	serum	1.70316
GSM1877815	non-cancer	serum	1.56178
GSM1877816	non-cancer	serum	2.44608
GSM1877817	non-cancer	serum	2.5355
GSM1877818	non-cancer	serum	1.99886
GSM1877819	non-cancer	serum	2.35097
GSM1877820	non-cancer	serum	1.34726
GSM1877821	non-cancer	serum	2.80395
GSM1877822	non-cancer	serum	2.92195
GSM1877823	non-cancer	serum	1.71741
GSM1877824	non-cancer	serum	2.08653
GSM1877825	non-cancer	serum	2.289
GSM1877826	non-cancer	serum	1.08618
GSM1877827	non-cancer	serum	2.71846
GSM1877828	non-cancer	serum	4.00803
GSM1877829	non-cancer	serum	2.58611
GSM1877830	non-cancer	serum	3.13213
GSM1877831	non-cancer	serum	2.29935
GSM1877832	non-cancer	serum	1.44288
GSM1877833	non-cancer	serum	1.25898
GSM1877834	non-cancer	serum	2.43764
GSM1877835	non-cancer	serum	1.52812
GSM1877836	non-cancer	serum	3.49682
GSM1877837	non-cancer	serum	2.40576
GSM1877838	non-cancer	serum	3.06225
GSM1877839	non-cancer	serum	2.29504
GSM1877840	non-cancer	serum	1.88062
GSM1877841	non-cancer	serum	1.37507
GSM1877842	non-cancer	serum	2.49665
GSM1877843	non-cancer	serum	0.879009
GSM1877844	non-cancer	serum	2.61298
GSM1877845	non-cancer	serum	2.40037
GSM1877846	non-cancer	serum	2.99394
GSM1877847	non-cancer	serum	2.17474
GSM1877848	non-cancer	serum	2.11395
GSM1877849	non-cancer	serum	2.78216
GSM1877850	non-cancer	serum	4.02846
GSM1877851	non-cancer	serum	2.38811
GSM1877852	non-cancer	serum	2.65973
GSM1877853	non-cancer	serum	1.61068
GSM1877854	non-cancer	serum	2.60175
GSM1877855	non-cancer	serum	1.16535
GSM1877856	non-cancer	serum	1.62289
GSM1877857	non-cancer	serum	1.41653
GSM1877858	non-cancer	serum	1.63086
GSM1877859	non-cancer	serum	2.00428
GSM1877860	non-cancer	serum	1.1318
GSM1877861	non-cancer	serum	3.2274
GSM1877862	non-cancer	serum	3.01198
GSM1877863	non-cancer	serum	1.63451
GSM1877864	non-cancer	serum	3.41451
GSM1877865	non-cancer	serum	1.85379
GSM1877866	non-cancer	serum	1.39125
GSM1877867	non-cancer	serum	2.46886
GSM1877868	non-cancer	serum	2.86677
GSM1877869	non-cancer	serum	2.61939
GSM1877870	non-cancer	serum	1.47774
GSM1877871	non-cancer	serum	1.38104
GSM1877872	non-cancer	serum	2.36063
GSM1877873	non-cancer	serum	1.49989
GSM1877874	non-cancer	serum	2.86739
GSM1877875	non-cancer	serum	1.40012
GSM1877876	non-cancer	serum	2.85768
GSM1877877	non-cancer	serum	1.11265
GSM1877878	non-cancer	serum	2.11244
GSM1877879	non-cancer	serum	2.34133
GSM1877880	non-cancer	serum	1.7336
GSM1877881	non-cancer	serum	1.29398
GSM1877882	non-cancer	serum	1.01059
GSM1877883	non-cancer	serum	0.905114
GSM1877884	non-cancer	serum	1.16077
GSM1877885	non-cancer	serum	0.680623
GSM1877886	non-cancer	serum	0.867409
GSM1877887	non-cancer	serum	1.22139
GSM1877888	non-cancer	serum	1.20147
GSM1877889	non-cancer	serum	0.915431
GSM1877890	non-cancer	serum	3.14471
GSM1877891	non-cancer	serum	2.70501
GSM1877892	non-cancer	serum	1.13624
GSM1877893	non-cancer	serum	2.03736
GSM1877894	non-cancer	serum	1.97852
GSM1877895	non-cancer	serum	1.30472
GSM1877896	non-cancer	serum	1.70094
GSM1877897	non-cancer	serum	1.17529
GSM1877898	non-cancer	serum	0.150871
GSM1877899	non-cancer	serum	0.915648
GSM1877900	non-cancer	serum	1.96173
GSM1877901	non-cancer	serum	0.621552
GSM1877902	non-cancer	serum	3.10421
GSM1877903	non-cancer	serum	0.605688
GSM1877904	non-cancer	serum	1.38619
GSM1877905	non-cancer	serum	2.02176
GSM1877906	non-cancer	serum	1.3911
GSM1877907	non-cancer	serum	0.354787
GSM1877908	non-cancer	serum	1.89085
GSM1877909	non-cancer	serum	1.8437
GSM1877910	non-cancer	serum	0.683198
GSM1877911	non-cancer	serum	1.29881
GSM1877912	non-cancer	serum	2.26591
GSM1877913	non-cancer	serum	1.10606
GSM1877914	non-cancer	serum	3.18893
GSM1877915	non-cancer	serum	2.11266
GSM1877916	non-cancer	serum	2.1634
GSM1877917	non-cancer	serum	1.84016
GSM1877918	non-cancer	serum	1.63237
GSM1877919	non-cancer	serum	2.68094
GSM1877920	non-cancer	serum	2.2363
GSM1877921	non-cancer	serum	2.46418
GSM1877922	non-cancer	serum	2.21606
GSM1877923	non-cancer	serum	1.56724
GSM1877924	non-cancer	serum	0.889755
GSM1877925	non-cancer	serum	1.01544
GSM1877926	non-cancer	serum	1.44446
GSM1877927	non-cancer	serum	0.383287
GSM1877928	non-cancer	serum	2.44017
GSM1877929	non-cancer	serum	1.56175
GSM1877930	non-cancer	serum	1.25889
GSM1877931	non-cancer	serum	1.35808
GSM1877932	non-cancer	serum	1.42303
GSM1877933	non-cancer	serum	2.02601
GSM1877934	non-cancer	serum	1.4425
GSM1877935	non-cancer	serum	2.04066
GSM1877936	non-cancer	serum	1.88307
GSM1877937	non-cancer	serum	1.10396
GSM1877938	non-cancer	serum	1.75994
GSM1877939	non-cancer	serum	1.27153
GSM1877940	non-cancer	serum	-0.472357
GSM1877941	non-cancer	serum	2.3352
GSM1877942	non-cancer	serum	2.34467
GSM1877943	non-cancer	serum	3.30853
GSM1877944	non-cancer	serum	2.30784
GSM1877945	non-cancer	serum	3.54066
GSM1877946	non-cancer	serum	1.99296
GSM1877947	non-cancer	serum	1.40142
GSM1877948	non-cancer	serum	1.39761
GSM1877949	non-cancer	serum	2.17972
GSM1877950	non-cancer	serum	2.11959
GSM1877951	non-cancer	serum	1.62213
GSM1877952	non-cancer	serum	1.69888
GSM1877953	non-cancer	serum	1.80346
GSM1877954	non-cancer	serum	2.72641
GSM1877955	non-cancer	serum	1.55998
GSM1877956	non-cancer	serum	2.6065
GSM1877957	non-cancer	serum	2.40766
GSM1877958	non-cancer	serum	1.47289
GSM1877959	non-cancer	serum	1.51914
GSM1877960	non-cancer	serum	2.13034
GSM1877961	non-cancer	serum	1.96469
GSM1877962	non-cancer	serum	1.53966
GSM1877963	non-cancer	serum	1.44071
GSM1877964	non-cancer	serum	0.385606
GSM1877965	non-cancer	serum	1.77763
GSM1877966	non-cancer	serum	0.890027
GSM1877967	non-cancer	serum	1.1945
GSM1877968	non-cancer	serum	1.53253
GSM1877969	non-cancer	serum	1.48221
GSM1877970	non-cancer	serum	1.88513
GSM1877971	non-cancer	serum	1.01358
GSM1877972	non-cancer	serum	2.25944
GSM1877973	non-cancer	serum	2.66356
GSM1877974	non-cancer	serum	1.19267
GSM1877975	non-cancer	serum	2.00197
GSM1877976	non-cancer	serum	2.52179
GSM1877977	non-cancer	serum	3.19832
GSM1877978	non-cancer	serum	0.891551
GSM1877979	non-cancer	serum	1.73588
GSM1877980	non-cancer	serum	1.79647
GSM1877981	non-cancer	serum	1.20614
GSM1877982	non-cancer	serum	1.40638
GSM1877983	non-cancer	serum	1.22945
GSM1877984	non-cancer	serum	1.38856
GSM1877985	non-cancer	serum	1.91693
GSM1877986	non-cancer	serum	0.819986
GSM1877987	non-cancer	serum	0.895561
GSM1877988	non-cancer	serum	1.39185
GSM1877989	non-cancer	serum	1.19705
GSM1877990	non-cancer	serum	0.522114
GSM1877991	non-cancer	serum	1.90864
GSM1877992	non-cancer	serum	1.29985
GSM1877993	non-cancer	serum	0.49279
GSM1877994	non-cancer	serum	0.720409
GSM1877995	non-cancer	serum	1.15119
GSM1877996	non-cancer	serum	1.95864
GSM1877997	non-cancer	serum	1.18814
GSM1877998	non-cancer	serum	1.30767
GSM1877999	non-cancer	serum	2.51272
GSM1878000	non-cancer	serum	2.54955
GSM1878001	non-cancer	serum	0.905293
GSM1878002	non-cancer	serum	-0.0350209
GSM1878003	non-cancer	serum	1.14294
GSM1878004	non-cancer	serum	2.02802
GSM1878005	non-cancer	serum	1.94483
GSM1878006	non-cancer	serum	2.55248
GSM1878007	non-cancer	serum	0.687461
GSM1878008	non-cancer	serum	1.52326
GSM1878009	non-cancer	serum	1.54188
GSM1878010	non-cancer	serum	1.17567
GSM1878011	non-cancer	serum	1.76052
GSM1878012	non-cancer	serum	0.727322
GSM1878013	non-cancer	serum	0.890187
GSM1878014	non-cancer	serum	1.41852
GSM1878015	non-cancer	serum	0.971055
GSM1878016	non-cancer	serum	1.24732
GSM1878017	non-cancer	serum	1.54058
GSM1878018	non-cancer	serum	2.78544
GSM1878019	non-cancer	serum	1.36693
GSM1878020	non-cancer	serum	1.89344
GSM1878021	non-cancer	serum	0.435318
GSM1878022	non-cancer	serum	0.717199
GSM1878023	non-cancer	serum	2.5447
GSM1878024	non-cancer	serum	1.13327
GSM1878025	non-cancer	serum	3.71503
GSM1878026	non-cancer	serum	2.13196
GSM1878027	non-cancer	serum	2.11728
GSM1878028	non-cancer	serum	1.73957
GSM1878029	non-cancer	serum	2.22049
GSM1878030	non-cancer	serum	2.08374
GSM1878031	non-cancer	serum	3.23975
GSM1878032	non-cancer	serum	1.06032
GSM1878033	non-cancer	serum	1.77765
GSM1878034	non-cancer	serum	0.756068
GSM1878035	non-cancer	serum	2.13026
GSM1878036	non-cancer	serum	1.18657
GSM1878037	non-cancer	serum	1.88113
GSM1878038	non-cancer	serum	2.14584
GSM1878039	non-cancer	serum	0.338636
GSM1878040	non-cancer	serum	1.96403
GSM1878041	non-cancer	serum	2.90203
GSM1878042	non-cancer	serum	1.51788
GSM1878043	non-cancer	serum	1.62579
GSM1878044	non-cancer	serum	0.459914
GSM1878045	non-cancer	serum	2.9787
GSM1878046	non-cancer	serum	2.12739
GSM1878047	non-cancer	serum	1.30262
GSM1878048	non-cancer	serum	2.61765
GSM1878049	non-cancer	serum	2.86256
GSM1878050	non-cancer	serum	0.470503
GSM1878051	non-cancer	serum	2.05575
GSM1878052	non-cancer	serum	2.54993
GSM1878053	non-cancer	serum	2.04515
GSM1878054	non-cancer	serum	0.465068
GSM1878055	non-cancer	serum	2.33056
GSM1878056	non-cancer	serum	0.96483
GSM1878057	non-cancer	serum	1.91946
GSM1878058	non-cancer	serum	2.38682
GSM1878059	non-cancer	serum	2.17761
GSM1878060	non-cancer	serum	1.03017
GSM1878061	non-cancer	serum	2.30277
GSM1878062	non-cancer	serum	1.24585
GSM1878063	non-cancer	serum	4.82553
GSM1878064	non-cancer	serum	2.76036
GSM1878065	non-cancer	serum	3.05114
GSM1878066	non-cancer	serum	2.93577
GSM1878067	non-cancer	serum	1.06432
GSM1878068	non-cancer	serum	1.63448
GSM1878069	non-cancer	serum	1.31148
GSM1878070	non-cancer	serum	1.17793
GSM1878071	non-cancer	serum	1.87823
GSM1878072	non-cancer	serum	0.619822
GSM1878073	non-cancer	serum	1.29163
GSM1878074	non-cancer	serum	2.15948
GSM1878075	non-cancer	serum	2.38715
GSM1878076	non-cancer	serum	0.977516
GSM1878077	non-cancer	serum	1.03867
GSM1878078	non-cancer	serum	1.53511
GSM1878079	non-cancer	serum	0.977515
GSM1878080	non-cancer	serum	0.916001
GSM1878081	non-cancer	serum	1.14034
GSM1878082	non-cancer	serum	0.861075
GSM1878083	non-cancer	serum	2.32073
GSM1878084	non-cancer	serum	1.51971
GSM1878085	non-cancer	serum	1.47375
GSM1878086	non-cancer	serum	2.34618
GSM1878087	non-cancer	serum	3.4175
GSM1878088	non-cancer	serum	1.88185
GSM1878089	non-cancer	serum	3.37517
GSM1878090	non-cancer	serum	2.65207
GSM1878091	non-cancer	serum	1.6431
GSM1878092	non-cancer	serum	1.4464
GSM1878093	non-cancer	serum	2.20483
GSM1878094	non-cancer	serum	1.12081
GSM1878095	non-cancer	serum	3.45352
GSM1878096	non-cancer	serum	2.51056
GSM1878097	non-cancer	serum	1.70341
GSM1878098	non-cancer	serum	2.61227
GSM1878099	non-cancer	serum	2.00397
GSM1878100	non-cancer	serum	1.66804
GSM1878101	non-cancer	serum	2.81113
GSM1878102	non-cancer	serum	0.928391
GSM1878103	non-cancer	serum	0.701719
GSM1878104	non-cancer	serum	2.54501
GSM1878105	non-cancer	serum	2.39714
GSM1878106	non-cancer	serum	2.6837
GSM1878107	non-cancer	serum	1.09815
GSM1878108	non-cancer	serum	3.79021
GSM1878109	non-cancer	serum	3.05208
GSM1878110	non-cancer	serum	0.946678
GSM1878111	non-cancer	serum	2.29355
GSM1878112	non-cancer	serum	1.73019
GSM1878113	non-cancer	serum	3.31504
GSM1878114	non-cancer	serum	3.05962
GSM1878115	non-cancer	serum	2.46887
GSM1878116	non-cancer	serum	2.59491
GSM1878117	non-cancer	serum	3.24542
GSM1878118	non-cancer	serum	2.02627
GSM1878119	non-cancer	serum	1.40595
GSM1878120	non-cancer	serum	2.95353
GSM1878121	non-cancer	serum	1.59183
GSM1878122	non-cancer	serum	2.93417
GSM1878123	non-cancer	serum	2.03094
GSM1878124	non-cancer	serum	2.47729
GSM1878125	non-cancer	serum	4.18086
GSM1878126	non-cancer	serum	2.78738
GSM1878127	non-cancer	serum	2.24743
GSM1878128	non-cancer	serum	1.9317
GSM1878129	non-cancer	serum	2.15493
GSM1878130	non-cancer	serum	1.93657
GSM1878131	non-cancer	serum	1.93338
GSM1878132	non-cancer	serum	2.86893
GSM1878133	non-cancer	serum	2.56098
GSM1878134	non-cancer	serum	2.07127
GSM1878135	non-cancer	serum	1.98147
GSM1878136	non-cancer	serum	0.705329
GSM1878137	non-cancer	serum	3.50103
GSM1878138	non-cancer	serum	2.03374
GSM1878139	non-cancer	serum	2.06346
GSM1878140	non-cancer	serum	1.19874
GSM1878141	non-cancer	serum	2.19858
GSM1878142	non-cancer	serum	1.97616
GSM1878143	non-cancer	serum	1.71381
GSM1878144	non-cancer	serum	3.21095
GSM1878145	non-cancer	serum	3.15806
GSM1878146	non-cancer	serum	2.37268
GSM1878147	non-cancer	serum	1.66438
GSM1878148	non-cancer	serum	2.4983
GSM1878149	non-cancer	serum	1.39011
GSM1878150	non-cancer	serum	1.88472
GSM1878151	non-cancer	serum	1.5617
GSM1878152	non-cancer	serum	2.43786
GSM1878153	non-cancer	serum	2.52883
GSM1878154	non-cancer	serum	2.02216
GSM1878155	non-cancer	serum	1.80778
GSM1878156	non-cancer	serum	1.62504
GSM1878157	non-cancer	serum	3.71772
GSM1878158	non-cancer	serum	0.332302
GSM1878159	non-cancer	serum	2.35739
GSM1878160	non-cancer	serum	3.16193
GSM1878161	non-cancer	serum	2.81625
GSM1878162	non-cancer	serum	1.58591
GSM1878163	non-cancer	serum	2.52157
GSM1878164	non-cancer	serum	1.93546
GSM1878165	non-cancer	serum	1.81731
GSM1878166	non-cancer	serum	2.67774
GSM1878167	non-cancer	serum	1.53278
GSM1878168	non-cancer	serum	2.25339
GSM1878169	non-cancer	serum	2.05326
GSM1878170	non-cancer	serum	1.82714
GSM1878171	non-cancer	serum	1.7042
GSM1878172	non-cancer	serum	1.63268
GSM1878173	non-cancer	serum	1.7402
GSM1878174	non-cancer	serum	1.5897
GSM1878175	non-cancer	serum	1.67379
GSM1878176	non-cancer	serum	2.15646
GSM1878177	non-cancer	serum	-0.310237
GSM1878178	non-cancer	serum	1.78512
GSM1878179	non-cancer	serum	1.89557
GSM1878180	non-cancer	serum	3.2334
GSM1878181	non-cancer	serum	2.13211
GSM1878182	non-cancer	serum	2.39813
GSM1878183	non-cancer	serum	1.10787
GSM1878184	non-cancer	serum	2.43259
GSM1878185	non-cancer	serum	1.451
GSM1878186	non-cancer	serum	1.90941
GSM1878187	non-cancer	serum	1.99294
GSM1878188	non-cancer	serum	2.48967
GSM1878189	non-cancer	serum	3.34682
GSM1878190	non-cancer	serum	1.62997
GSM1878191	non-cancer	serum	2.03244
GSM1878192	non-cancer	serum	2.50142
GSM1878193	non-cancer	serum	2.5165
GSM1878194	non-cancer	serum	1.32024
GSM1878195	non-cancer	serum	1.48516
GSM1878196	non-cancer	serum	1.5847
GSM1878197	non-cancer	serum	0.954923
GSM1878198	non-cancer	serum	1.16172
GSM1878199	non-cancer	serum	2.60272
GSM1878200	non-cancer	serum	2.01035
GSM1878201	non-cancer	serum	2.12422
GSM1878202	non-cancer	serum	1.99849
GSM1878203	non-cancer	serum	0.591088
GSM1878204	non-cancer	serum	1.71961
GSM1878205	non-cancer	serum	2.5451
GSM1878206	non-cancer	serum	2.18438
GSM1878207	non-cancer	serum	2.10775
GSM1878208	non-cancer	serum	-0.231938
GSM1878209	non-cancer	serum	2.2901
GSM1878210	non-cancer	serum	1.57587
GSM1878211	non-cancer	serum	1.88791
GSM1878212	non-cancer	serum	1.40836
GSM1878213	non-cancer	serum	2.9219
GSM1878214	non-cancer	serum	1.09529
GSM1878215	non-cancer	serum	2.09344
GSM1878216	non-cancer	serum	1.53719
GSM1878217	non-cancer	serum	1.11837
GSM1878218	non-cancer	serum	1.80813
GSM1878219	non-cancer	serum	1.37253
GSM1878220	non-cancer	serum	0.170784
GSM1878221	non-cancer	serum	1.73787
GSM1878222	non-cancer	serum	1.55279
GSM1878223	non-cancer	serum	1.44726
GSM1878224	non-cancer	serum	0.716781
GSM1878225	non-cancer	serum	2.05736
GSM1878226	non-cancer	serum	1.31368
GSM1878227	non-cancer	serum	3.79055
GSM1878228	non-cancer	serum	2.65039
GSM1878229	non-cancer	serum	2.18898
GSM1878230	non-cancer	serum	2.27605
GSM1878231	non-cancer	serum	1.25149
GSM1878232	non-cancer	serum	1.60557
GSM1878233	non-cancer	serum	1.75049
GSM1878234	non-cancer	serum	2.93746
GSM1878235	non-cancer	serum	2.46017
GSM1878236	non-cancer	serum	2.35186
GSM1878237	non-cancer	serum	1.19121
GSM1878238	non-cancer	serum	2.79841
GSM1878239	non-cancer	serum	2.73386
GSM1878240	non-cancer	serum	1.68977
GSM1878241	non-cancer	serum	2.3918
GSM1878242	non-cancer	serum	2.30218
GSM1878243	non-cancer	serum	2.10725
GSM1878244	non-cancer	serum	3.14339
GSM1878245	non-cancer	serum	0.423768
GSM1878246	non-cancer	serum	1.73642
GSM1878247	non-cancer	serum	1.79252
GSM1878248	non-cancer	serum	1.69872
GSM1878249	non-cancer	serum	1.51526
GSM1878250	non-cancer	serum	0.228992
GSM1878251	non-cancer	serum	-0.249227
GSM1878252	non-cancer	serum	1.20127
GSM1878253	non-cancer	serum	2.87254
GSM1878254	non-cancer	serum	0.72882
GSM1878255	non-cancer	serum	1.34386
GSM1878256	non-cancer	serum	1.53841
GSM1878257	non-cancer	serum	1.17199
GSM1878258	non-cancer	serum	2.05048
GSM1878259	non-cancer	serum	1.5807
GSM1878260	non-cancer	serum	2.10798
GSM1878261	non-cancer	serum	1.47832
GSM1878262	non-cancer	serum	3.03566
GSM1878263	non-cancer	serum	3.46952
GSM1878264	non-cancer	serum	3.40067
GSM1878265	non-cancer	serum	1.88295
GSM1878266	non-cancer	serum	0.483404
GSM1878267	non-cancer	serum	2.05481
GSM1878268	non-cancer	serum	1.11088
GSM1878269	non-cancer	serum	0.23051
GSM1878270	non-cancer	serum	2.12768
GSM1878271	non-cancer	serum	2.64418
GSM1878272	non-cancer	serum	2.43491
GSM1878273	non-cancer	serum	3.18707
GSM1878274	non-cancer	serum	0.859284
GSM1878275	non-cancer	serum	2.31471
GSM1878276	non-cancer	serum	0.438766
GSM1878277	non-cancer	serum	1.75333
GSM1878278	non-cancer	serum	3.14617
GSM1878279	non-cancer	serum	3.85012
GSM1878280	non-cancer	serum	2.48556
GSM1878281	non-cancer	serum	1.79362
GSM1878282	non-cancer	serum	3.04804
GSM1878283	non-cancer	serum	2.38768
GSM1878284	non-cancer	serum	2.3509
GSM1878285	non-cancer	serum	2.51737
GSM1878286	non-cancer	serum	2.11648
GSM1878287	non-cancer	serum	1.95553
GSM1878288	non-cancer	serum	2.15872
GSM1878289	non-cancer	serum	3.75091
GSM1878290	non-cancer	serum	2.30744
GSM1878291	non-cancer	serum	2.29983
GSM1878292	non-cancer	serum	1.39139
GSM1878293	non-cancer	serum	1.14724
GSM1878294	non-cancer	serum	1.79175
GSM1878295	non-cancer	serum	2.58831
GSM1878296	non-cancer	serum	1.86824
GSM1878297	non-cancer	serum	1.93074
GSM1878298	non-cancer	serum	0.821496
GSM1878299	non-cancer	serum	1.50957
GSM1878300	non-cancer	serum	2.94118
GSM1878301	non-cancer	serum	1.78734
GSM1878302	non-cancer	serum	1.63931
GSM1878303	non-cancer	serum	2.66266
GSM1878304	non-cancer	serum	1.00965
GSM1878305	non-cancer	serum	1.75895
GSM1878306	non-cancer	serum	1.39196
GSM1878307	non-cancer	serum	0.991449
GSM1878308	non-cancer	serum	1.58197
GSM1878309	non-cancer	serum	3.39668
GSM1878310	non-cancer	serum	2.34351
GSM1878311	non-cancer	serum	2.63156
GSM1878312	non-cancer	serum	2.95179
GSM1878313	non-cancer	serum	1.6288
GSM1878314	non-cancer	serum	2.07024
GSM1878315	non-cancer	serum	1.51417
GSM1878316	non-cancer	serum	2.61191
GSM1878317	non-cancer	serum	1.65448
GSM1878318	non-cancer	serum	2.22759
GSM1878319	non-cancer	serum	1.91068
GSM1878320	non-cancer	serum	2.8831
GSM1878321	non-cancer	serum	2.41209
GSM1878322	non-cancer	serum	1.18761
GSM1878323	non-cancer	serum	1.4491
GSM1878324	non-cancer	serum	2.82145
GSM1878325	non-cancer	serum	2.36139
GSM1878326	non-cancer	serum	2.97587
GSM1878327	non-cancer	serum	1.35193
GSM1878328	non-cancer	serum	2.3436
GSM1878329	non-cancer	serum	3.03257
GSM1878330	non-cancer	serum	2.34486
GSM1878331	non-cancer	serum	0.216695
GSM1878332	non-cancer	serum	3.14976
GSM1878333	non-cancer	serum	2.85585
GSM1878334	non-cancer	serum	1.79738
GSM1878335	non-cancer	serum	1.65135
GSM1878336	non-cancer	serum	1.9246
GSM1878337	non-cancer	serum	0.626661
GSM1878338	non-cancer	serum	2.0368
GSM1878339	non-cancer	serum	3.12361
GSM1878340	non-cancer	serum	2.84415
GSM1878341	non-cancer	serum	1.92493
GSM1878342	non-cancer	serum	2.57396
GSM1878343	non-cancer	serum	2.50166
GSM1878344	non-cancer	serum	2.23492
GSM1878345	non-cancer	serum	2.15518
GSM1878346	non-cancer	serum	1.71012
GSM1878347	non-cancer	serum	2.60882
GSM1878348	non-cancer	serum	2.24507
GSM1878349	non-cancer	serum	2.17804
GSM1878350	non-cancer	serum	0.129214
GSM1878351	non-cancer	serum	1.33299
GSM1878352	non-cancer	serum	1.11085
GSM1878353	non-cancer	serum	1.9003
GSM1878354	non-cancer	serum	3.30804
GSM1878355	non-cancer	serum	2.59591
GSM1878356	non-cancer	serum	3.03742
GSM1878357	non-cancer	serum	1.79966
GSM1878358	non-cancer	serum	2.19505
GSM1878359	non-cancer	serum	3.05133
GSM1878360	non-cancer	serum	2.36286
GSM1878361	non-cancer	serum	1.11461
GSM1878362	non-cancer	serum	1.02772
GSM1878363	non-cancer	serum	1.76236
GSM1878364	non-cancer	serum	2.31482
GSM1878365	non-cancer	serum	1.89291
GSM1878366	non-cancer	serum	3.16326
GSM1878367	non-cancer	serum	3.29198
GSM1878368	non-cancer	serum	1.87282
GSM1878369	non-cancer	serum	3.3169
GSM1878370	non-cancer	serum	0.96907
GSM1878371	non-cancer	serum	3.19628
GSM1878372	non-cancer	serum	2.63934
GSM1878373	non-cancer	serum	2.70806
GSM1878374	non-cancer	serum	4.02544
GSM1878375	non-cancer	serum	2.46718
GSM1878376	non-cancer	serum	1.12055
GSM1878377	non-cancer	serum	3.14978
GSM1878378	non-cancer	serum	1.96578
GSM1878379	non-cancer	serum	2.36008
GSM1878380	non-cancer	serum	1.17582
GSM1878381	non-cancer	serum	2.9217
GSM1878382	non-cancer	serum	0.782002
GSM1878383	non-cancer	serum	2.92683
GSM1878384	non-cancer	serum	1.96495
GSM1878385	non-cancer	serum	1.69047
GSM1878386	non-cancer	serum	2.62895
GSM1878387	non-cancer	serum	2.46174
GSM1878388	non-cancer	serum	2.35534
GSM1878389	non-cancer	serum	1.6665
GSM1878390	non-cancer	serum	1.79341
GSM1878391	non-cancer	serum	1.92054
GSM1878392	non-cancer	serum	1.04242
GSM1878393	non-cancer	serum	-0.274802
GSM1878394	non-cancer	serum	2.56423
GSM1878395	non-cancer	serum	0.977092
GSM1878396	non-cancer	serum	1.216
GSM1878397	non-cancer	serum	1.32473
GSM1878398	non-cancer	serum	2.31819
GSM1878399	non-cancer	serum	1.82863
GSM1878400	non-cancer	serum	1.25138
GSM1878401	non-cancer	serum	1.81612
GSM1878402	non-cancer	serum	2.88815
GSM1878403	non-cancer	serum	1.96318
GSM1878404	non-cancer	serum	2.57262
GSM1878405	non-cancer	serum	1.9967
GSM1878406	non-cancer	serum	3.1536
GSM1878407	non-cancer	serum	1.27478
GSM1878408	non-cancer	serum	2.29241
GSM1878409	non-cancer	serum	2.17245
GSM1878410	non-cancer	serum	1.68684
GSM1878411	non-cancer	serum	1.53891
GSM1878412	non-cancer	serum	0.726764
GSM1878413	non-cancer	serum	2.46655
GSM1878414	non-cancer	serum	2.11255
GSM1878415	non-cancer	serum	1.30237
GSM1878416	non-cancer	serum	1.97213
GSM1878417	non-cancer	serum	2.68115
GSM1878418	non-cancer	serum	1.60276
GSM1878419	non-cancer	serum	1.8302
GSM1878420	non-cancer	serum	1.86379
[truncated: 2,114 more rows]
